# Supplementary material for: In Situ Representation of Soil/Sediment Conductivity Using Electrochemical Impedance Spectroscopy
Source: PubMed Central journal article supplement (PMC4883316; doi:10.3390/s16050625), 2016-04-30
Supplement: sensors-16-00625-s001.pdf [file sensors-16-00625-s001.pdf]

# Supplementary Materials: *In Situ* Representation of Soil/Sediment Conductivity Using Electrochemical Impedance Spectroscopy

Xiaojing Li, Xin Wang, Qian Zhao, Yueyong Zhang and Qixing Zhou

Table S1  $R_s$ ,  $R_{ct}$  and capacitance of duplicate measurement showed in Table 2.

| Moisture Content | Distance from Air-Cathode      | 1 cm     | 2 cm     | 3 cm     | 4 cm     | 5 cm     |
|------------------|--------------------------------|----------|----------|----------|----------|----------|
| 9.10%            | $R_s$ ( $\Omega$ )             | 41.25    | 62.58    | 44.2     | 65.46    | 66.94    |
|                  | $R_{ct}$ ( $\Omega$ )          | 80.59    | 113.7    | 14.45    | 2117     | 1066     |
|                  | $C$ ( $\Omega^{-1}\cdot s^n$ ) | 0.009935 | 0.006599 | 0.01182  | 0.00331  | 0.00327  |
| 16.70%           | $R_s$ ( $\Omega$ )             | 19.49    | 33.48    | 41.37    | 43.87    | 47.93    |
|                  | $R_{ct}$ ( $\Omega$ )          | 111.351  | 181.54   | 102.27   | 99.54    | 60.03    |
|                  | $C$ ( $\Omega^{-1}\cdot s^n$ ) | 0.060721 | 0.101225 | 0.061747 | 0.071812 | 0.070578 |
| 23.10%           | $R_s$ ( $\Omega$ )             | 3.654    | 4.329    | 7.122    | 8.554    | 9.351    |
|                  | $R_{ct}$ ( $\Omega$ )          | 56.587   | 171.1    | 27.4     | 112.19   | 4.35     |
|                  | $C$ ( $\Omega^{-1}\cdot s^n$ ) | 0.064302 | 0.045649 | 0.217757 | 0.030561 | 0.205322 |
| 28.60%           | $R_s$ ( $\Omega$ )             | 3.265    | 4.527    | 6.736    | 8.667    | 8.899    |
|                  | $R_{ct}$ ( $\Omega$ )          | 64.47    | 254.8    | 49.17    | 59.31    | 7.155    |
|                  | $C$ ( $\Omega^{-1}\cdot s^n$ ) | 0.069352 | 0.041354 | 0.133952 | 0.1241   | 0.163727 |
| 33.30%           | $R_s$ ( $\Omega$ )             | 2.454    | 4.182    | 5.868    | 6.949    | 6.975    |
|                  | $R_{ct}$ ( $\Omega$ )          | 47.58    | 687.7    | 182.75   | 41.22    | 6.008    |
|                  | $C$ ( $\Omega^{-1}\cdot s^n$ ) | 0.071042 | 0.001387 | 0.046463 | 0.055404 | 0.176602 |
| 37.50%           | $R_s$ ( $\Omega$ )             | 2.364    | 3.738    | 4.889    | 6.448    | 6.641    |
|                  | $R_{ct}$ ( $\Omega$ )          | 46.9     | 495.397  | 82.43    | 40.02    | 4.877    |
|                  | $C$ ( $\Omega^{-1}\cdot s^n$ ) | 0.073304 | 0.000345 | 0.023344 | 0.068155 | 0.275701 |

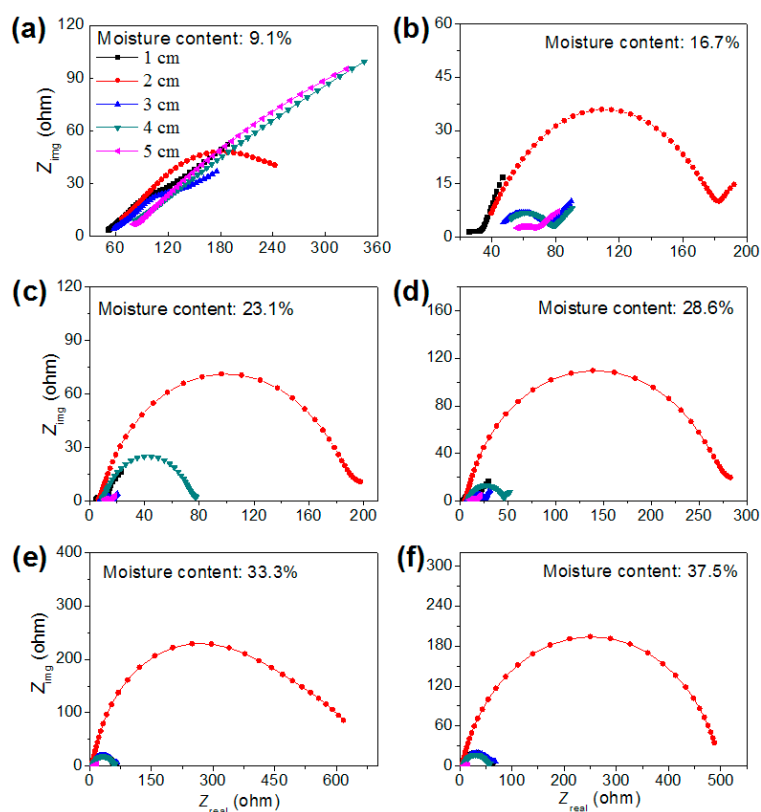

Figure S1. Duplicate measurements of samples shown in Figure 2. Nyquist plots (a–f) of soils of different moisture contents at open circuit potential and the equivalent circuit (g) for simulating electrochemical impedance spectroscopy.
